# Supplementary material for: Reference Genes for Real-Time PCR Quantification of MicroRNAs and Messenger RNAs in Rat Models of Hepatotoxicity
Source: PubMed Central journal article supplement (PMC3341372; doi:10.1371/journal.pone.0036323), 2012-05-01

Figure S1

Representative amplification and melt-curve profiles of Real-Time qPCR assays

Candidate reference genes for microRNA normalization

Candidate reference genes for mRNA normalization

Amplification plots

Melting Curves

Amplification plots

Melting Curves

F (dR) x1000 vs. Cycle

F (-R'(T)) x1000 vs. T(°C)

F (dR) x1000 vs. Cycle

F (-R'(T)) x1000 vs. T(°C)

**5S**

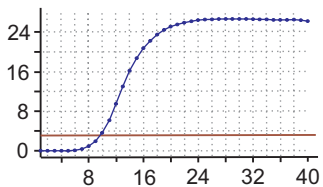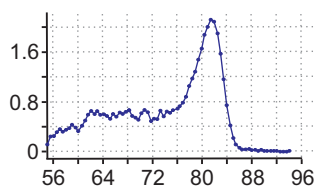

**18S**

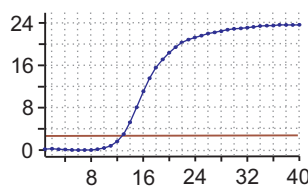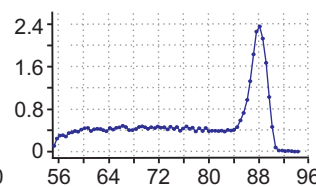

**miR-16**

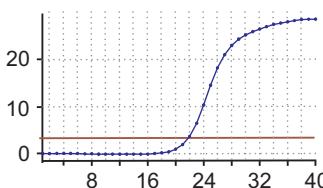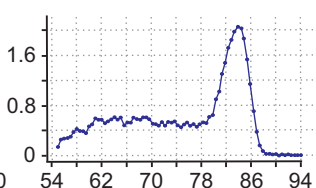

**ACTB**

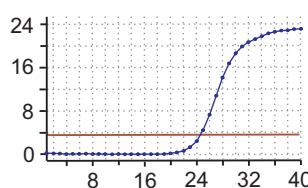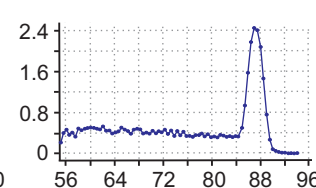

**miR-103**

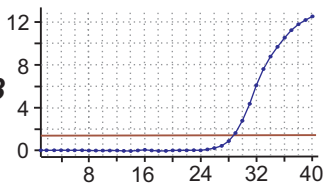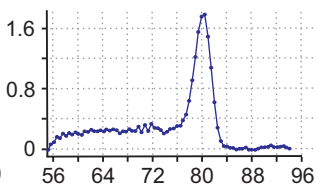

**ALB**

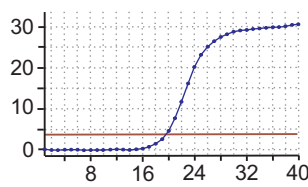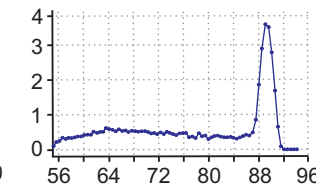

**miR-191**

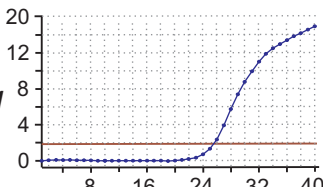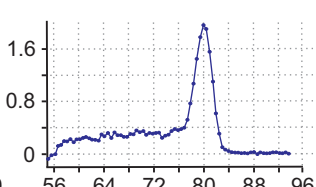

**B2M**

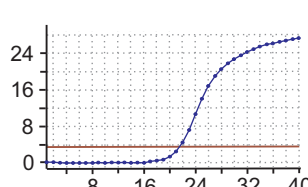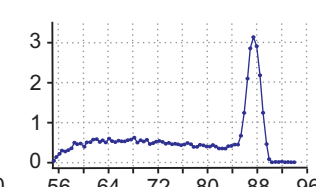

**miR-Let7a**

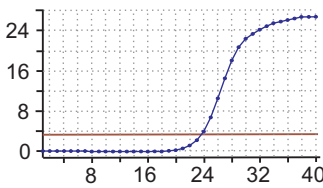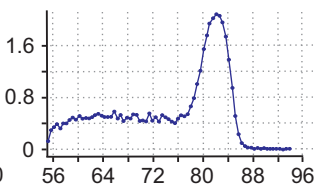

**CYCA**

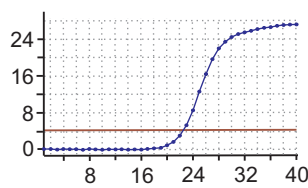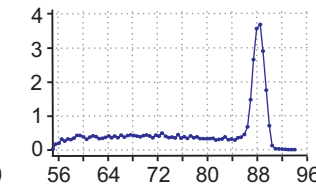

**RNU48**

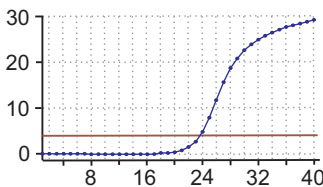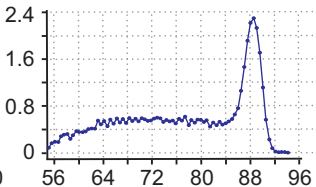

**GAPDH**

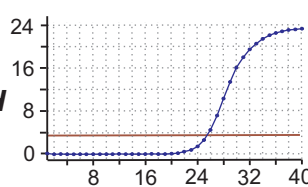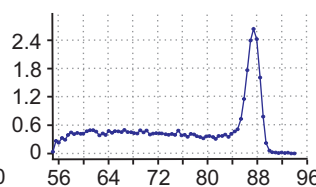

**U6**

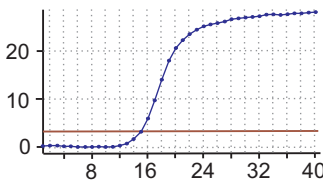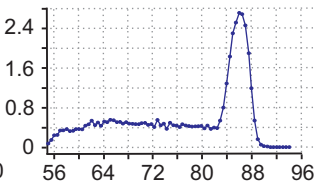

**HPRT1**

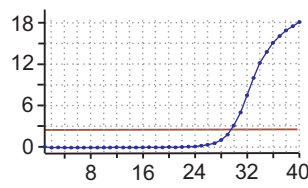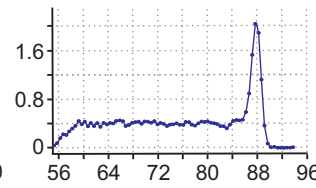

**SDHA**

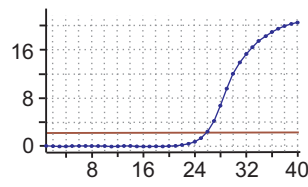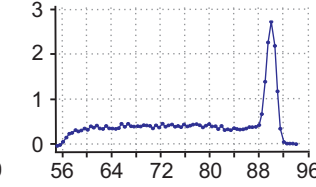

# Representative amplification and melt-curve profiles of Real-Time qPCR assays

## Genes of interest

### Amplification plots

F (dR) x1000 vs. Cycle

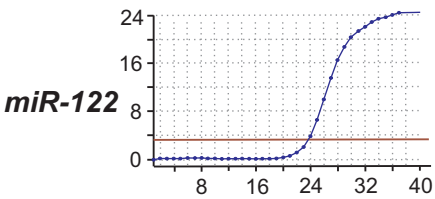

### Melting Curves

F (-R'(T)) x1000 vs. T(°C)

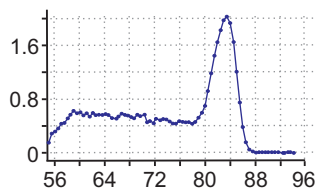

### Amplification plots

F (dR) x1000 vs. Cycle

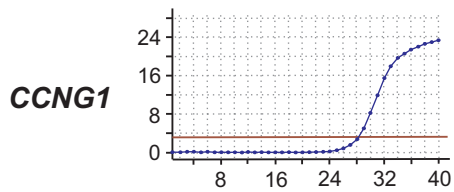

### Melting Curves

F (-R'(T)) x1000 vs. T(°C)

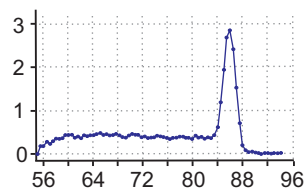

Supplement: pone.0036323.s001.pdf [file pone.0036323.s001.pdf]
