# Supplementary material for: Reference Genes for Real-Time PCR Quantification of MicroRNAs and Messenger RNAs in Rat Models of Hepatotoxicity
Source: PLoS One. 2012 May 1;7(5):e36323. doi: 10.1371/journal.pone.0036323 (PMC3341372; doi:10.1371/journal.pone.0036323)
Supplement: Data S3 — Example of calculation of the Normalization efficiency index (NEI) for different normalization methods in an study of liver gene expression between control and carbon tetrachloride (CT) treated rats. (XLS) [file pone.0036323.s008.xls]

## Sheet: up regulation
Data S3
Calculation of Normalization efficiency index (NEI) for differents normalization methods in an study of liver gene expression between control and carbon tetrachloride (CT) treated rats.
	Coefficient (*)	std error of coefficient (*)	efficiency (1)	std error of efficiency (1)
5S	-3.6192	0.1795	1.88931	0.0596155
mir16	-3.87	0.1338	1.813	0.0372948
mir103	-3.159	0.17	2.07279	0.0813057
mir191	-3.148	0.0827	2.07808	0.0399313
mirlet7a	-3.5412	0.2271	1.91598	0.0798955
RNU48	-3.7538	0.1187	1.8467	0.0358196
(*) Information gotten from standard curves
	miR-16	miR-16	miR-16	miR-16	miR-16	miR-16	miR-16	miR-16	miR-16	miR-16	miR-16	miR-16	5S	5S	5S	5S	5S	5S	5S	5S	5S	5S	5S	5S	miR-Let-7a	miR-Let-7a	miR-Let-7a	miR-Let-7a	miR-Let-7a	miR-Let-7a	miR-Let-7a	miR-Let-7a	miR-Let-7a	miR-Let-7a	miR-Let-7a	miR-Let-7a	miR-191	miR-191	miR-191	miR-191	miR-191	miR-191	miR-191	miR-191	miR-191	miR-191	miR-191	miR-191	miR-103
UP regulation								arbitrary to get p=0.05 (#)												arbitrary to get p=0.05 (#)												arbitrary to get p=0.05 (#)												arbitrary to get p=0.05 (#)
			eficiencia	std error of eficiencia				1.051							eficiencia	std error of eficiencia				1.183							eficiencia	std error of eficiencia				1.015							eficiencia	std error of eficiencia				1.032
			1.813	0.0372948				hypotetical GOI	hypotetical GOI		hypotetical GOI				1.88931	0.0596155				hypotetical GOI	hypotetical GOI		hypotetical GOI				1.91598	0.0798955				hypotetical GOI	hypotetical GOI		hypotetical GOI				2.07808	0.0399313				hypotetical GOI	hypotetical GOI		hypotetical GOI
	Cq raw	Cq promedio	SD Cq	delta Cq	RQ (1)	Std error of RQ (1)	Relative Error of RQ	simulated RQ	NRQ 5S	Std error of NRQ (1)	log transformed NRQ 5S	t-test	Cq raw	Cq promedio	SD Cq	delta Cq	RQ (1)	Std error of RQ (1)	Relative Error of RQ	simulated RQ	NRQ 5S	Std error of NRQ (1)	log transformed NRQ 5S	t-test	Cq raw	Cq promedio	SD Cq	delta Cq	RQ (1)	Std error of RQ (1)	Relative Error of RQ	simulated RQ	NRQ 5S	Std error of NRQ (1)	log transformed NRQ 5S	t-test	Cq raw	Cq promedio	SD Cq	delta Cq	RQ (1)	Std error of RQ (1)	Relative Error of RQ	simulated RQ	NRQ 5S	Std error of NRQ (1)	log transformed NRQ 5S	t-test	Cq raw
CCT1	22.9	22.9	0	-0.2585	0.857441	0.00455947	0.00531754	1	1.16626	0.00620164	0.0667959	0.0502253	10.4	10.345	0.0777817	-0.1135	0.930335	0.0461588	0.0496152	1	1.07488	0.0533305	0.0313605	0.0498402	23.81	23.895	0.120208	0.2335	1.16396	0.0916814	0.0787668	1	0.859136	0.0676714	-0.0659381	0.050286	26.64	26.635	0.00707107	-0.224	0.848875	0.00571194	0.00672884	1	1.17803	0.00792677	0.0711563	0.0496733	30.93
	22.9												10.29												23.98												26.63												31.19
CCT2	22.36	22.27	0.127279	0.3715	1.24737	0.0949417	0.0761136	1	0.801688	0.0610193	-0.0959948		9.92	9.9	0.0282843	0.3315	1.23479	0.0257012	0.0208142	1	0.809851	0.0168564	-0.0915948		23.98	23.82	0.226274	0.3085	1.22213	0.180498	0.147691	1	0.818244	0.120847	-0.0871174		26.02	26.145	0.176777	0.266	1.21478	0.157197	0.129403	1	0.823193	0.106524	-0.0844981		29.72
	22.18												9.88												23.66												26.27												29.81
CCT3	22.36	22.295	0.0919239	0.3465	1.22895	0.0677837	0.0551557	1	0.813701	0.0448802	-0.0895349		9.88	9.865	0.0212132	0.3665	1.2626	0.0224404	0.0177731	1	0.792017	0.0140766	-0.101265		23.93	23.915	0.0212132	0.2135	1.14892	0.0188619	0.016417	1	0.870382	0.0142891	-0.0602903		25.96	26.02	0.0848528	0.391	1.33109	0.083217	0.0625182	1	0.751267	0.0469678	-0.124206		29.92
	22.23												9.85												23.9												26.08												29.86
CCT4	22.79	22.79	0	-0.1485	0.915436	0.00279643	0.00305475	1	1.09238	0.00333694	0.0383721		10.38	10.43	0.0707107	-0.1985	0.881361	0.0400323	0.045421	1	1.13461	0.0515351	0.0548464		23.97	24.015	0.0636396	0.1135	1.07659	0.0448401	0.04165	1	0.928857	0.0386869	-0.0320513		26.23	26.415	0.26163	-0.004	0.997079	0.190808	0.191367	1	1.00293	0.191928	0.00127065		30.05
	22.79												10.48												24.06												26.6												30.15
CCT5	22.49	22.535	0.0636396	0.1065	1.06542	0.0404089	0.0379278	1	0.9386	0.0355991	-0.0275194		10.55	10.48	0.0989949	-0.2485	0.853765	0.0541869	0.0634682	1	1.17128	0.0743392	0.0686616		24.27	24.29	0.0282843	-0.1615	0.900314	0.0176331	0.0195854	1	1.11072	0.021754	0.045606		26.27	26.3	0.0424264	0.111	1.08458	0.0337366	0.0311057	1	0.922018	0.0286801	-0.0352605		30.46
	22.58												10.41												24.31												26.33												30.46
TC1	22.91	22.805	0.148492	-0.1635	0.907302	0.0802187	0.0884145	1.051	1.15838	0.102418	0.0638508		10.19	10.185	0.00707107	0.0465	1.03003	0.00487402	0.00473194	1.183	1.14851	0.0054347	0.0601366		23.88	24.105	0.318198	0.0235	1.0154	0.210089	0.206903	1.015	0.999608	0.206822	-0.000170126		26.99	26.845	0.205061	-0.434	0.728006	0.109363	0.150222	1.032	1.41757	0.212951	0.151545		30.32
	22.7												10.18												24.33												26.7												30.58
TC2	22.89	22.83	0.0848528	-0.1885	0.893906	0.0452627	0.0506347	1.051	1.17574	0.0595332	0.0703107		10.53	10.54	0.0141421	-0.3085	0.821789	0.0108934	0.0132557	1.183	1.43954	0.0190821	0.158225		24.47	24.475	0.00707107	-0.3465	0.798274	0.0121041	0.0151628	1.015	1.27149	0.0192794	0.104314		26.34	26.435	0.13435	-0.024	0.982599	0.0965607	0.0982708	1.032	1.05028	0.103211	0.0213036		30.58
	22.77												10.55												24.48												26.53												30.51
TC3	22.65	22.655	0.00707107	-0.0135	0.992	0.00418259	0.00421632	1.051	1.05948	0.00446709	0.0250911		10.26	10.27	0.0141421	-0.0385	0.975803	0.00885938	0.00907906	1.183	1.21233	0.0110069	0.0836225		24.68	24.69	0.0141421	-0.5615	0.694125	0.0174609	0.0251553	1.015	1.46227	0.0367839	0.165028		26.09	26.31	0.311127	0.101	1.07667	0.245029	0.22758	1.032	0.958508	0.218137	-0.0184042		30.54
	22.66												10.28												24.7												26.53												30.63
TC4	22.58	22.59	0.0141421	0.0515	1.03112	0.00874465	0.00848076	1.051	1.01928	0.00864431	0.00829522		10.41	10.4	0.0141421	-0.1685	0.898344	0.00938856	0.010451	1.183	1.31687	0.0137625	0.119542		24.3	24.21	0.127279	-0.0815	0.948386	0.078555	0.0828302	1.015	1.07024	0.0886481	0.0294808		26.33	26.48	0.212132	-0.069	0.950783	0.147531	0.155168	1.032	1.08542	0.168423	0.0355984		30.62
	22.6												10.39												24.12												26.63												30.46
TC5	22.7	22.745	0.0636396	-0.1035	0.940277	0.0356594	0.0379243	1.051	1.11776	0.0423901	0.0483469		9.92	9.9	0.0282843	0.3315	1.23479	0.0257012	0.0208142	1.183	0.958054	0.0199411	-0.0186101		23.86	23.87	0.0141421	0.2585	1.18304	0.0167621	0.0141687	1.015	0.857962	0.0121563	-0.0665318		26.52	26.525	0.00707107	-0.114	0.919997	0.00516749	0.00561686	1.032	1.12174	0.00630067	0.0498932		30.46
	22.79												9.88												23.88												26.53												30.49
	prom Cq	22.6415						average control	0.962525				prom Cq	10.2315						average control	0.996528				prom Cq	24.1285						average control	0.917468				prom Cq	26.411						average control	0.935488				prom Cq
								average treated	1.10613											average treated	1.21506											average treated	1.13232											average treated	1.1267
								NEI up regulation	1.14919											NEI up regulation	1.2193											NEI up regulation	1.23417											NEI up regulation	1.2044
								average Std error of NRQ (1)	0.0368489											average Std error of NRQ (1)	0.0279365											average Std error of NRQ (1)	0.0626939											average Std error of NRQ (1)	0.109105
Down regulation								arbitrary to get p=0.05 (#)												arbitrary to get p=0.05 (#)												arbitrary to get p=0.05 (#)												arbitrary to get p=0.05 (#)
			eficiencia	std error of eficiencia				0.78							eficiencia	std error of eficiencia				0.788							eficiencia	std error of eficiencia				0.682							eficiencia	std error of eficiencia				0.707
			1.813	0.0372948				hypotetical GOI	hypotetical GOI		hypotetical GOI				1.88931	0.0596155				hypotetical GOI	hypotetical GOI		hypotetical GOI				1.91598	0.0798955				hypotetical GOI	hypotetical GOI		hypotetical GOI				2.07808	0.0399313				hypotetical GOI	hypotetical GOI		hypotetical GOI
	Cq raw	Cq promedio	SD Cq	delta Cq	RQ (1)	Std error of RQ (1)	Relative Error of RQ	simulated RQ	NRQ 5S	Std error of NRQ (1)	log transformed NRQ 5S	t-test	Cq raw	Cq promedio	SD Cq	delta Cq	RQ (1)	Std error of RQ (1)	Relative Error of RQ	simulated RQ	NRQ 5S	Std error of NRQ (1)	log transformed NRQ 5S	t-test	Cq raw	Cq promedio	SD delta Cq	delta Cq	RQ (1)	Std error of RQ (1)	Relative Error of RQ	simulated RQ	NRQ 5S	Std error of NRQ (1)	log transformed NRQ 5S	t-test	Cq raw	Cq promedio	SD delta Cq	delta Cq	RQ (1)	Std error of RQ (1)	Relative Error of RQ	simulated RQ	NRQ 5S	Std error of NRQ (1)	log transformed NRQ 5S	t-test	Cq raw
CCT1	22.9	22.9	0	-0.2585	0.857441	0.00455947	0.00531754	1	1.16626	0.00620164	0.0667959	0.0502302	10.4	10.345	0.0777817	-0.1135	0.930335	0.0461588	0.0496152	1	1.07488	0.0533305	0.0313605	0.049686	23.81	23.895	0.120208	0.2335	1.16396	0.0916814	0.0787668	1	0.859136	0.0676714	-0.0659381	0.0504242	26.64	26.635	0.00707107	-0.224	0.848875	0.00571194	0.00672884	1	1.17803	0.00792677	0.0711563	0.0502452	30.93
	22.9												10.29												23.98												26.63												31.19
CCT2	22.36	22.27	0.127279	0.3715	1.24737	0.0949417	0.0761136	1	0.801688	0.0610193	-0.0959948		9.92	9.9	0.0282843	0.3315	1.23479	0.0257012	0.0208142	1	0.809851	0.0168564	-0.0915948		23.98	23.82	0.226274	0.3085	1.22213	0.180498	0.147691	1	0.818244	0.120847	-0.0871174		26.02	26.145	0.176777	0.266	1.21478	0.157197	0.129403	1	0.823193	0.106524	-0.0844981		29.72
	22.18												9.88												23.66												26.27												29.81
CCT3	22.36	22.295	0.0919239	0.3465	1.22895	0.0677837	0.0551557	1	0.813701	0.0448802	-0.0895349		9.88	9.865	0.0212132	0.3665	1.2626	0.0224404	0.0177731	1	0.792017	0.0140766	-0.101265		23.93	23.915	0.0212132	0.2135	1.14892	0.0188619	0.016417	1	0.870382	0.0142891	-0.0602903		25.96	26.02	0.0848528	0.391	1.33109	0.083217	0.0625182	1	0.751267	0.0469678	-0.124206		29.92
	22.23												9.85												23.9												26.08												29.86
CCT4	22.79	22.79	0	-0.1485	0.915436	0.00279643	0.00305475	1	1.09238	0.00333694	0.0383721		10.38	10.43	0.0707107	-0.1985	0.881361	0.0400323	0.045421	1	1.13461	0.0515351	0.0548464		23.97	24.015	0.0636396	0.1135	1.07659	0.0448401	0.04165	1	0.928857	0.0386869	-0.0320513		26.23	26.415	0.26163	-0.004	0.997079	0.190808	0.191367	1	1.00293	0.191928	0.00127065		30.05
	22.79												10.48												24.06												26.6												30.15
CCT5	22.49	22.535	0.0636396	0.1065	1.06542	0.0404089	0.0379278	1	0.9386	0.0355991	-0.0275194		10.55	10.48	0.0989949	-0.2485	0.853765	0.0541869	0.0634682	1	1.17128	0.0743392	0.0686616		24.27	24.29	0.0282843	-0.1615	0.900314	0.0176331	0.0195854	1	1.11072	0.021754	0.045606		26.27	26.3	0.0424264	0.111	1.08458	0.0337366	0.0311057	1	0.922018	0.0286801	-0.0352605		30.46
	22.58												10.41												24.31												26.33												30.46
TC1	22.91	22.805	0.148492	-0.1635	0.907302	0.0802187	0.0884145	0.78	0.859692	0.0760092	-0.0656573		10.19	10.185	0.00707107	0.0465	1.03003	0.00487402	0.00473194	0.788	0.765029	0.00362007	-0.116322		23.88	24.105	0.318198	0.0235	1.0154	0.210089	0.206903	0.682	0.671658	0.138968	-0.172852		26.99	26.845	0.205061	-0.434	0.728006	0.109363	0.150222	0.707	0.971146	0.145888	-0.0127153		30.32
	22.7												10.18												24.33												26.7												30.58
TC2	22.89	22.83	0.0848528	-0.1885	0.893906	0.0452627	0.0506347	0.78	0.872575	0.0441826	-0.0591974		10.53	10.54	0.0141421	-0.3085	0.821789	0.0108934	0.0132557	0.788	0.958884	0.0127106	-0.018234		24.47	24.475	0.00707107	-0.3465	0.798274	0.0121041	0.0151628	0.682	0.854344	0.0129543	-0.0683674		26.34	26.435	0.13435	-0.024	0.982599	0.0965607	0.0982708	0.707	0.719521	0.0707079	-0.142957		30.58
	22.77												10.55												24.48												26.53												30.51
TC3	22.65	22.655	0.00707107	-0.0135	0.992	0.00418259	0.00421632	0.78	0.78629	0.00331525	-0.104417		10.26	10.27	0.0141421	-0.0385	0.975803	0.00885938	0.00907906	0.788	0.80754	0.00733171	-0.0928361		24.68	24.69	0.0141421	-0.5615	0.694125	0.0174609	0.0251553	0.682	0.982531	0.0247159	-0.00765356		26.09	26.31	0.311127	0.101	1.07667	0.245029	0.22758	0.707	0.656652	0.149441	-0.182664		30.54
	22.66												10.28												24.7												26.53												30.63
TC4	22.58	22.59	0.0141421	0.0515	1.03112	0.00874465	0.00848076	0.78	0.756462	0.00641537	-0.121213		10.41	10.4	0.0141421	-0.1685	0.898344	0.00938856	0.010451	0.788	0.877169	0.00916726	-0.0569165		24.3	24.21	0.127279	-0.0815	0.948386	0.078555	0.0828302	0.682	0.719116	0.0595645	-0.143201		26.33	26.48	0.212132	-0.069	0.950783	0.147531	0.155168	0.707	0.743598	0.115383	-0.128662		30.62
	22.6												10.39												24.12												26.63												30.46
TC5	22.7	22.745	0.0636396	-0.1035	0.940277	0.0356594	0.0379243	0.78	0.829543	0.0314598	-0.0811612		9.92	9.9	0.0282843	0.3315	1.23479	0.0257012	0.0208142	0.788	0.638163	0.0132828	-0.195069		23.86	23.87	0.0141421	0.2585	1.18304	0.0167621	0.0141687	0.682	0.576483	0.00816804	-0.239213		26.52	26.525	0.00707107	-0.114	0.919997	0.00516749	0.00561686	0.707	0.768481	0.00431645	-0.114367		30.46
	22.79												9.88												23.88												26.53												30.49
	prom Cq	22.6415						average control	0.962525				prom Cq	10.2315						average control	0.996528				prom Cq	24.1285						average control	0.917468				prom Cq	26.411						average control	0.935488				prom Cq
								average treated	0.820912											average treated	0.809357											average treated	0.760826											average treated	0.77188
								NEI down regulation	1.17251											NEI down regulation	1.23126											NEI down regulation	1.20588											NEI down regulation	1.21196
								average Std error of NRQ (1)	0.0312419											average Std error of NRQ (1)	0.025625											average Std error of NRQ (1)	0.050762											average Std error of NRQ (1)	0.0867763
(#) It is used an approximation strategy which consist of iteration of the simulation of the expression of hypothetical gene of interest in order to get an exact p-value equal to 0.050.
References
(1) qBase relative quantification framework and software for management and automated analysis of real-time quantitative PCR data. Hellemans J, Mortier G, De Paepe A, Speleman F, Vandesompele J. Genome Biol. 2007;8(2):R19.
[truncated: 58 more columns]

## Sheet: Hoja3
Down regulation								arbitrary value in ordet to get p=0.05 (#)													arbitrary value in ordet to get p=0.05 (#)													arbitrary value in ordet to get p=0.05 (#)													arbitrary value in ordet to get p=0.05 (#)
			eficiencia	std error of eficiencia	prom Cq			0.69								eficiencia	std error of eficiencia	prom Cq			0.745								eficiencia	std error of eficiencia	prom Cq			0.509								eficiencia	std error of eficiencia	prom Cq			0.663
			1.89	0.06	10.2313			hypotetical GOI	hypotetical GOI	hypotetical GOI						1.813	0.0372948	22.6419			hypotetical GOI	hypotetical GOI	hypotetical GOI				Cq	efeciencia	2.07279	0.0813057	30.3831			hypotetical GOI	hypotetical GOI	hypotetical GOI				Cq	efeciencia	2.07808	0.0399313	26.4106			hypotetical GOI	hypotetical GOI	hypotetical GOI
	Cq raw	Cq promedio	SD delta Cq	delta Cq	RQ (1)	Std error of RQ (1)	Relative Error of RQ	simulated RQ	NRQ 5S	log transformed NRQ 5S	t-test			Cq raw	Cq promedio	SD delta Cq	delta Cq	RQ (1)	Std error of RQ (1)	Relative Error of RQ	simulated RQ	NRQ miR-16	log transformed NRQ miR-16	t-test			Cq raw	Cq promedio	SD delta Cq	delta Cq	RQ (1)	Std error of RQ (1)	Relative Error of RQ	simulated RQ	NRQ miR-103	log transformed miR-103	t-test			Cq raw	Cq promedio	SD delta Cq	delta Cq	RQ (1)	Std error of RQ (1)	Relative Error of RQ	simulated RQ	NRQ miR-191	log transformed NRQ miR-191
control sample 1	10.4	10.345	0.0777817	#REF!	#REF!	#REF!	#REF!	1	#REF!	#REF!	#REF!			22.9	22.9	0	-22.9	4.70581e-07	3.40036e-07	0.722588	1	2.12503e+06	6.32737	0.064324			31.19	31.19	0	-31.1101	#DIV/0!	#DIV/0!	#DIV/0!	1	#DIV/0!	#DIV/0!	#DIV/0!			26.64	26.635	0.00707107	-24.5569	#DIV/0!	#DIV/0!	#DIV/0!	1	#DIV/0!	#DIV/0!
	10.29													22.9													31.19													26.63
control sample 2	9.92	9.9	0.0282843	#REF!	#REF!	#REF!	#REF!	1	#REF!	#REF!				22.36	22.27	0.127279	-22.27	7.02597e-07	4.96988e-07	0.707359	1	1.42329e+06	6.15329				29.72	29.765	0.0636396	-29.6851	#DIV/0!	#DIV/0!	#DIV/0!	1	#DIV/0!	#DIV/0!				26.02	26.145	0.176777	-24.0669	#DIV/0!	#DIV/0!	#DIV/0!	1	#DIV/0!	#DIV/0!
	9.88													22.18													29.81													26.27
control sample 3	9.71	9.78	0.0989949	#REF!	#REF!	#REF!	#REF!	1	#REF!	#REF!				22.36	22.295	0.0919239	-22.295	6.91511e-07	4.88154e-07	0.705924	1	1.44611e+06	6.1602				29.92	29.89	0.0424264	-29.8101	#DIV/0!	#DIV/0!	#DIV/0!	1	#DIV/0!	#DIV/0!				25.96	26.02	0.0848528	-23.9419	#DIV/0!	#DIV/0!	#DIV/0!	1	#DIV/0!	#DIV/0!
	9.85													22.23													29.86													26.08
control sample 4	10.38	10.43	0.0707107	#REF!	#REF!	#REF!	#REF!	1	#REF!	#REF!				22.79	22.79	0	-22.79	5.04694e-07	3.62934e-07	0.719117	1	1.9814e+06	6.29697				30.05	30.1	0.0707107	-30.0201	#DIV/0!	#DIV/0!	#DIV/0!	1	#DIV/0!	#DIV/0!				26.23	26.415	0.26163	-24.3369	#DIV/0!	#DIV/0!	#DIV/0!	1	#DIV/0!	#DIV/0!
	10.48													22.79													30.15													26.6
CT sample 1	10.19	10.185	0.00707107	#REF!	#REF!	#REF!	#REF!	0.69	#REF!	#REF!				22.91	22.805	0.148492	-22.805	4.99901e-07	3.6281e-07	0.725765	0.745	1.4903e+06	6.17327				30.32	30.45	0.183848	-30.3701	#DIV/0!	#DIV/0!	#DIV/0!	0.509	#DIV/0!	#DIV/0!				26.99	26.845	0.205061	-24.7669	#DIV/0!	#DIV/0!	#DIV/0!	0.663	#DIV/0!	#DIV/0!
	10.18													22.7													30.58													26.7
CT sample 2	10.53	10.54	0.0141421	#REF!	#REF!	#REF!	#REF!	0.69	#REF!	#REF!				22.89	22.83	0.0848528	-22.83	4.92012e-07	3.55429e-07	0.722399	0.745	1.51419e+06	6.18018				30.58	30.545	0.0494975	-30.4651	#DIV/0!	#DIV/0!	#DIV/0!	0.509	#DIV/0!	#DIV/0!				26.34	26.435	0.13435	-24.3569	#DIV/0!	#DIV/0!	#DIV/0!	0.663	#DIV/0!	#DIV/0!
	10.55													22.77													30.51													26.53
CT sample 3	10.26	10.27	0.0141421	#REF!	#REF!	#REF!	#REF!	0.69	#REF!	#REF!				22.65	22.655	0.00707107	-22.655	5.49958e-07	3.93149e-07	0.714871	0.745	1.35465e+06	6.13183				30.54	30.585	0.0636396	-30.5051	#DIV/0!	#DIV/0!	#DIV/0!	0.509	#DIV/0!	#DIV/0!				26.09	26.31	0.311127	-24.2319	#DIV/0!	#DIV/0!	#DIV/0!	0.663	#DIV/0!	#DIV/0!
	10.28													22.66													30.63													26.53
CT sample 4	10.41	10.4	0.0141421	#REF!	#REF!	#REF!	#REF!	0.69	#REF!	#REF!				22.58	22.59	0.0141421	-22.59	5.73177e-07	4.08597e-07	0.712863	0.745	1.29977e+06	6.11387				30.62	30.54	0.113137	-30.4601	#DIV/0!	#DIV/0!	#DIV/0!	0.509	#DIV/0!	#DIV/0!				26.33	26.48	0.212132	-24.4019	#DIV/0!	#DIV/0!	#DIV/0!	0.663	#DIV/0!	#DIV/0!
	10.39													22.6													30.46													26.63
						average rel error RQ	#REF!	average control	#REF!										average rel error RQ	0.716361	average control	1.74396e+06										average rel error RQ	#DIV/0!	average control	#DIV/0!										average rel error RQ	#DIV/0!	average control	#DIV/0!
								average treated	#REF!												average treated	1.41473e+06												average treated	#DIV/0!												average treated	#DIV/0!
							CT 5S	NEI down regulation	#REF!											CT miR16	NEI down regulation	1.23272											CT miR103	NEI down regulation	#DIV/0!											CT miR191	NEI down regulation	#DIV/0!
								error NEI	#REF!												error NEI	0.88307												error NEI	#DIV/0!												error NEI	#DIV/0!
(#) It is used an approximation strategy which consist of iteration of the simulation of the expression of hypothetical gene of interest in order to get an exact p-value equal to 0.050.
References
(1) qBase relative quantification framework and software for management and automated analysis of real-time quantitative PCR data. Hellemans J, Mortier G, De Paepe A, Speleman F, Vandesompele J. Genome Biol. 2007;8(2):R19.
[truncated: 23 more columns]
