# Supplementary material for: Reference Genes for Real-Time PCR Quantification of MicroRNAs and Messenger RNAs in Rat Models of Hepatotoxicity
Source: PubMed Central journal article supplement (PMC3341372; doi:10.1371/journal.pone.0036323), 2012-05-01
Supplement: pone.0036323.s003.pdf [file pone.0036323.s003.pdf]

**Figure S3**

**Study of normalization efficiency of candidate reference genes for microRNA and mRNA.**

UP regulation  
DOWN regulation

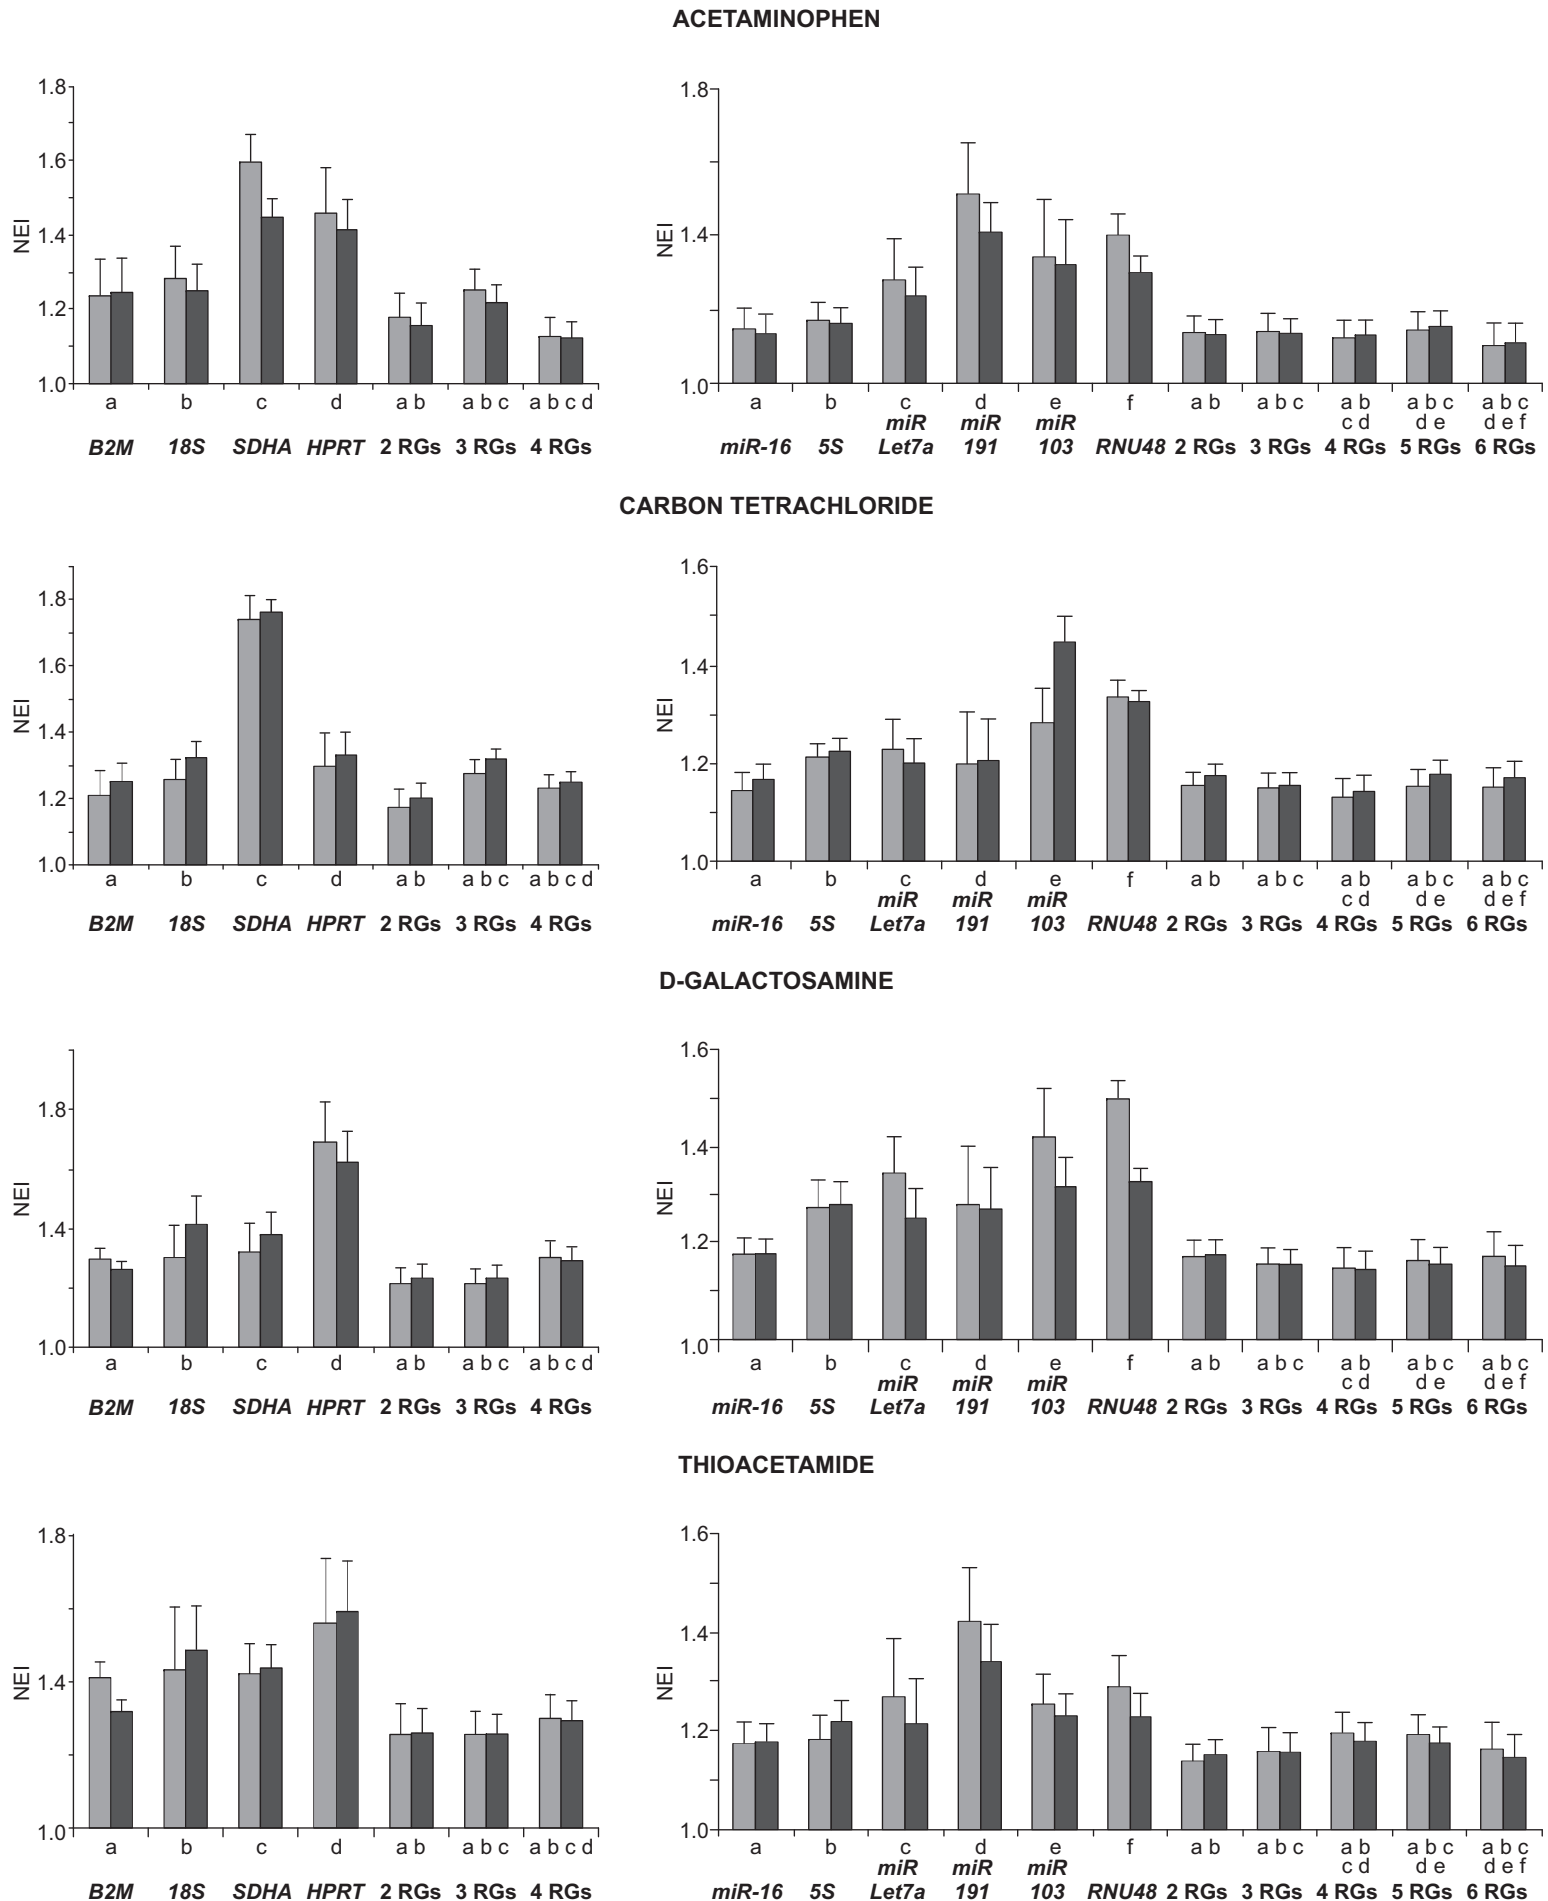

The figure shows the normalization efficiency index (NEI) calculated for each hepatotoxin in up- and down-regulation situations. We defined the NEI value as the minimum fold up- or down-regulation to observe a significant expression difference (t-test,  $p=0.05$ ,  $n=5$ ) between control and treated groups using a particular normalization method. The NEI is calculated by normalizing against individual reference genes or a combination of two or more reference gene added stepwise, following the left-to-right stability rank established previously. The error bars were determined through calculating the error propagation of the normalized relative quantity of transcript.
