# Supplementary material for: Reference Genes for Real-Time PCR Quantification of MicroRNAs and Messenger RNAs in Rat Models of Hepatotoxicity
Source: PubMed Central journal article supplement (PMC3341372; doi:10.1371/journal.pone.0036323), 2012-05-01
Supplement: pone.0036323.s004.pdf [file pone.0036323.s004.pdf]

**Table S1**  
**Checklist MIQE**

| Item to check                                               | Importance |                                                                                                                                                                                                                                                                                                                                                                                                                                                               |
|-------------------------------------------------------------|------------|---------------------------------------------------------------------------------------------------------------------------------------------------------------------------------------------------------------------------------------------------------------------------------------------------------------------------------------------------------------------------------------------------------------------------------------------------------------|
| <b>Experimental design</b>                                  |            |                                                                                                                                                                                                                                                                                                                                                                                                                                                               |
| Definition of experimental and control groups               | E          | <b>Experimental groups:</b> rats treated with hepatotoxins (acetaminophen, carbon tetrachloride, D-galactosamine, thioacetamide) at different dosis. <b>Control groups:</b> vehicle-treated rats                                                                                                                                                                                                                                                              |
| Number within each group                                    | E          | n=5 for dosis-response curves; n=5 for RGs evaluation in highest dosis-treated animales                                                                                                                                                                                                                                                                                                                                                                       |
| Assay carried out by the core or investigator's laboratory? | D          |                                                                                                                                                                                                                                                                                                                                                                                                                                                               |
| Acknowledgment of authors' contributions                    | D          |                                                                                                                                                                                                                                                                                                                                                                                                                                                               |
| <b>Sample</b>                                               |            |                                                                                                                                                                                                                                                                                                                                                                                                                                                               |
| Description                                                 | E          | <b>Experimental samples:</b> livers from rats treated with hepatotoxics at different dosis. <b>Control samples:</b> livers from vehicle-treated rats                                                                                                                                                                                                                                                                                                          |
| Volume/mass of sample processed                             | D          | 10 mg                                                                                                                                                                                                                                                                                                                                                                                                                                                         |
| Microdissection or macrodissection                          | E          | Macrodissection                                                                                                                                                                                                                                                                                                                                                                                                                                               |
| Processing procedure                                        | E          | Rats were anesthetized with intraperitoneal injection of ketamine (100 mg/kg rat) / xilazine (3 mg/kg rat) and sacrificed by induction of pneumotorax. Liver was isolated and washed with saline solution.                                                                                                                                                                                                                                                    |
| If frozen, how and how quickly?                             | E          | Liver tissues were frozen in liquid N2 immediatly after they were obtained and washed.                                                                                                                                                                                                                                                                                                                                                                        |
| If fixed, with what and how quickly?                        | E          | Not fixed                                                                                                                                                                                                                                                                                                                                                                                                                                                     |
| Sample storage conditions and duration                      | E          | Samples were held at -70°C for up to one week before RNA isolation                                                                                                                                                                                                                                                                                                                                                                                            |
| <b>Nucleic acid extraction</b>                              |            |                                                                                                                                                                                                                                                                                                                                                                                                                                                               |
| Procedure and/or instrumentation                            | E          | Total RNA was extracted using the TRIzol Reagent (Invitrogen) following manufacture's protocol. Homogenization of samples was performed in tissue grind tube and pestle using 1 mL of TRIzol Reagent per 10 mg of tissue (left liver lobe). Following homogenization, insoluble material from the homogenate was removed by centrifugation at 12,000 g for 10 minutes at 4°C. The purified RNA was dissolved in 40 ul DEPC-Treated Water and stored at -70°C. |
| Name of kit and details of any modifications                | E          | TRIzol Reagent (Invitrogen). We exactly followed manufacture's protocol.                                                                                                                                                                                                                                                                                                                                                                                      |
| Source of additional reagents used                          | D          | Chloroform (Merck); 2-propanol (Merck); Ethanol (Merck); DEPC-Treated Water (Ambion)                                                                                                                                                                                                                                                                                                                                                                          |
| Details of DNase or RNase treatment                         | E          | 1 ug of RNA was treated with 1 U of RQ1 RNase-Free DNase (Promega) in a 20 ul final volume reaction. Digestion of DNA was achieved with 30 minutes incubation at 37°C. The reaction was stopped with 1 ul of DNase Stop Solution (Promega) following 10 min incubation at 65°C for inactivation.                                                                                                                                                              |
| Contamination assessment (DNA or RNA)                       | E          | reverse transcription controls (without enzyme) were performed in order to assess the absence of DNA in the RNA sample. For that purpose, RNA was processed as a normal sample in the RT step, except that no reverse transcriptase was added to the reaction mixture (see "complete reaction conditions" in Reverse Transcription).                                                                                                                          |
| Nucleic acid quantification                                 | E          | RNA concentration was determined by measuring the absorbance at 260 nm UV light                                                                                                                                                                                                                                                                                                                                                                               |
| Instrument and method                                       | E          | NanoVue (GE Healthcare) UV spectrophotometer                                                                                                                                                                                                                                                                                                                                                                                                                  |
| Purity (A260/A280)                                          | D          | RNA purity was determined by measuring the absorbance ratio 260/280                                                                                                                                                                                                                                                                                                                                                                                           |
| Yeld                                                        | D          | RNA yeld was calculated as the amount of RNA obtained (ug) per mg of tissue processed. The average yeld was 2.45, with a minimum value of 1.3 and a maximum value of 4.43.                                                                                                                                                                                                                                                                                    |
| RNA integrity: method/instrument                            | E          | The RNA integrity was assessed by the 18S and 28S band intensity ratio after 1.5% agarose gel electrophoresis visualized by ethidium bromide staining. Only those samples with a 28S/18S ratio $\geq 1.7$ were used.                                                                                                                                                                                                                                          |
| RIN/RQI or Cq of 3' and 5' transcripts                      | E          | Not applicable                                                                                                                                                                                                                                                                                                                                                                                                                                                |
| Electrophoresis traces                                      | D          |                                                                                                                                                                                                                                                                                                                                                                                                                                                               |
| Inhibition testing (Cq dilutions, spike, or other)          | E          | The standard curve has been considered sufficient to rule out the presence of inhibitors of reverse-transcription activity or PCR, also taking into account the high quality of starting RNAs.                                                                                                                                                                                                                                                                |

| Reverse transcription                                      |   |                                                                                                                                                                                                                                                                                                                                                                                                                                                                                                                                                                                                                                                                                                                                                                                                                                                                                                                                                                                                                                                                                                                                                                                                                                                                                                                                                                                                                                                                                                                               |
|------------------------------------------------------------|---|-------------------------------------------------------------------------------------------------------------------------------------------------------------------------------------------------------------------------------------------------------------------------------------------------------------------------------------------------------------------------------------------------------------------------------------------------------------------------------------------------------------------------------------------------------------------------------------------------------------------------------------------------------------------------------------------------------------------------------------------------------------------------------------------------------------------------------------------------------------------------------------------------------------------------------------------------------------------------------------------------------------------------------------------------------------------------------------------------------------------------------------------------------------------------------------------------------------------------------------------------------------------------------------------------------------------------------------------------------------------------------------------------------------------------------------------------------------------------------------------------------------------------------|
| Complete reaction conditions                               | E | <p>REVERSE TRANSCRIPTION OF microRNAs AND SMALL RNAs: 10 ul of RNA (from the DNase treatment reaction mixture) was firstly incubated with 1 ul dNTP Mix 10 mM and 2 ul of a specific primers mixture, in a final volume of 13.5 ul. This mixture was heated to 65°C for 5 min and then incubated on ice for at least 1 min for primer annealing. Finally, the sample was mixed with 4 ul 5X First-Strand Buffer, 1 ul 0.1 M DTT, 1 ul RNase OUT 40 U/ul (Invitrogen) and 0.5 ul SuperScript III 200 U/ul (Invitrogen). Reactions were incubated in a GeneAmp PCR System 2400 (Perkin Elmer) at 16 °C for 30 min, 42 °C for 30 min, 50 °C for 60 min and 70°C for 15 min to stop the reaction. The 10 ul remaining of the DNase treatment reaction mixture was used for the No-RT control.</p> <p>REVERSE TRANSCRIPTION OF mRNA: 10 ul of RNA (from the DNase treatment reaction mixture) was firstly incubated with 0.5 ul Oligo dT 0.5 ug/ul, 1 ul dNTP Mix 10 mM and 2 ul of specific primer for 18S. This mixture was heated to 65°C for 5 min and then incubated on ice for at least 1 min for primer annealing. Finally, the sample was mixed with 4 ul 5X First-Strand Buffer, 1 ul 0.1 M DTT, 1 ul RNase OUT 40 U/ul (Invitrogen) and 0.5 ul SuperScript III 200 U/ul (Invitrogen). Reactions were incubated in a GeneAmp PCR System 2400 (Perkin Elmer) at 50 °C for 60 min and 70°C for 15 min to stop the reaction. The 10 ul remaining of the DNase treatment reaction mixture was used for the No-RT control.</p> |
| Amount of RNA and reaction volume                          | E | Amount of RNA: 500 ng; Reaction volume: 20 ul                                                                                                                                                                                                                                                                                                                                                                                                                                                                                                                                                                                                                                                                                                                                                                                                                                                                                                                                                                                                                                                                                                                                                                                                                                                                                                                                                                                                                                                                                 |
| Priming oligonucleotide (if using GSP) and concentration   | E | 18S: 2.5 uM; U6: 0.75 uM; 0.75 uM 5S; 50 nM Stem Loop-Oligos for miR-16, miR-Let7a, RNU48, miR-191, miR-103, miR-122                                                                                                                                                                                                                                                                                                                                                                                                                                                                                                                                                                                                                                                                                                                                                                                                                                                                                                                                                                                                                                                                                                                                                                                                                                                                                                                                                                                                          |
| Reverse transcriptase and concentration                    | E | SuperScript III (Invitrogen) in final concentration: 5 U/ul                                                                                                                                                                                                                                                                                                                                                                                                                                                                                                                                                                                                                                                                                                                                                                                                                                                                                                                                                                                                                                                                                                                                                                                                                                                                                                                                                                                                                                                                   |
| Temperature and time                                       | E | Specified in "Complete reaction conditions"                                                                                                                                                                                                                                                                                                                                                                                                                                                                                                                                                                                                                                                                                                                                                                                                                                                                                                                                                                                                                                                                                                                                                                                                                                                                                                                                                                                                                                                                                   |
| Manufacturer of reagents and catalogue numbers             | D | DNase (Promega, Cat. M610A); GeneAmp dNTP Mix with dTTP (Applied Biosystem, Cat. N8080260); SuperScript III (Invitrogen, Cat. 18080-044); RNase Out (Invitrogen, Cat 10777-019)                                                                                                                                                                                                                                                                                                                                                                                                                                                                                                                                                                                                                                                                                                                                                                                                                                                                                                                                                                                                                                                                                                                                                                                                                                                                                                                                               |
| Cqs with and without reverse transcription                 | D |                                                                                                                                                                                                                                                                                                                                                                                                                                                                                                                                                                                                                                                                                                                                                                                                                                                                                                                                                                                                                                                                                                                                                                                                                                                                                                                                                                                                                                                                                                                               |
| Storage conditions of cDNA                                 | D | -20°C                                                                                                                                                                                                                                                                                                                                                                                                                                                                                                                                                                                                                                                                                                                                                                                                                                                                                                                                                                                                                                                                                                                                                                                                                                                                                                                                                                                                                                                                                                                         |
| qPCR protocol                                              |   |                                                                                                                                                                                                                                                                                                                                                                                                                                                                                                                                                                                                                                                                                                                                                                                                                                                                                                                                                                                                                                                                                                                                                                                                                                                                                                                                                                                                                                                                                                                               |
| Complete reaction conditions                               | E | PCR reactions were performed in a Mx3000P Real Time Thermocycler (Stratagene) using SYBR Green I (Invitrogen) in final volume of 20 ul. Reaction mix consisted of 2 ul 10X PCR Buffer, 1.2 ul 50 mM MgCl <sub>2</sub> , 0.4 ul 10 mM GeneAmp dNTP Mix (Applied Biosystems), 0.8 ul SYBR Green I (Invitrogen), 0.1 ul 5 U/ul Platinum® Taq DNA Polymerase (Invitrogen), 4 ul 2.5 uM primer mix (forward and reverse primers) and 5 ul of 1/20 or 1/50 cDNA. The PCR reactions were initiated with 1 minute incubation at 95°C, followed by 40 cycles of 95°C for 15 seconds, 60°C for 30 seconds and 72°C for 40 seconds. All reactions were performed in duplicate.                                                                                                                                                                                                                                                                                                                                                                                                                                                                                                                                                                                                                                                                                                                                                                                                                                                           |
| Reaction volume and amount of cDNA/DNA                     | E | Reaction volume: 20 ul; amount of cDNA: 5 ul of 1/50 dilution for microRNA and smal RNA determination or 1/20 dilution for mRNA or rRNA determinations                                                                                                                                                                                                                                                                                                                                                                                                                                                                                                                                                                                                                                                                                                                                                                                                                                                                                                                                                                                                                                                                                                                                                                                                                                                                                                                                                                        |
| Primer, (probe), Mg <sub>2</sub> , and dNTP concentrations | E | 500 nM Primers; 3 mM MgCl <sub>2</sub> ; 0.2 mM dNTP                                                                                                                                                                                                                                                                                                                                                                                                                                                                                                                                                                                                                                                                                                                                                                                                                                                                                                                                                                                                                                                                                                                                                                                                                                                                                                                                                                                                                                                                          |
| Polymerase identity and concentration                      | E | Taq DNA Polymerase (Invitrogen, Cat. 10966-026) in final concentration: 0.025 U/ul                                                                                                                                                                                                                                                                                                                                                                                                                                                                                                                                                                                                                                                                                                                                                                                                                                                                                                                                                                                                                                                                                                                                                                                                                                                                                                                                                                                                                                            |
| Buffer/kit identity and manufacturer                       | E | 10X PCR Buffer, Minus Mg (Invitrogen)                                                                                                                                                                                                                                                                                                                                                                                                                                                                                                                                                                                                                                                                                                                                                                                                                                                                                                                                                                                                                                                                                                                                                                                                                                                                                                                                                                                                                                                                                         |
| Exact chemical composition of the buffer                   | D |                                                                                                                                                                                                                                                                                                                                                                                                                                                                                                                                                                                                                                                                                                                                                                                                                                                                                                                                                                                                                                                                                                                                                                                                                                                                                                                                                                                                                                                                                                                               |
| Additives (SYBR Green I, DMSO, and so forth)               | E | SYBR® Green I Nucleic Acid Gel Stain (Invitrogen)                                                                                                                                                                                                                                                                                                                                                                                                                                                                                                                                                                                                                                                                                                                                                                                                                                                                                                                                                                                                                                                                                                                                                                                                                                                                                                                                                                                                                                                                             |
| Manufacturer of plates/tubes and catalog number            | D | PCR Strip Tubes (PCR-0208-C) and PCR Strip Caps (PCR-2CP-RT-C), both provided by Axygen                                                                                                                                                                                                                                                                                                                                                                                                                                                                                                                                                                                                                                                                                                                                                                                                                                                                                                                                                                                                                                                                                                                                                                                                                                                                                                                                                                                                                                       |
| Complete thermocycling parameters                          | E | Initial denaturation: 95°C for 1 minute, then 40 cycles at 95°C for 15 seconds, 60°C for 30 seconds and 72°C for 40 seconds                                                                                                                                                                                                                                                                                                                                                                                                                                                                                                                                                                                                                                                                                                                                                                                                                                                                                                                                                                                                                                                                                                                                                                                                                                                                                                                                                                                                   |
| Reaction setup (manual/robotic)                            | D | Manual                                                                                                                                                                                                                                                                                                                                                                                                                                                                                                                                                                                                                                                                                                                                                                                                                                                                                                                                                                                                                                                                                                                                                                                                                                                                                                                                                                                                                                                                                                                        |
| Manufacturer of qPCR instrument                            | D | Mx3000P Real Time Thermocycler (Stratagene)                                                                                                                                                                                                                                                                                                                                                                                                                                                                                                                                                                                                                                                                                                                                                                                                                                                                                                                                                                                                                                                                                                                                                                                                                                                                                                                                                                                                                                                                                   |

| qPCR validation                                |   |                                                                                                                                                                                                                                                                                                                                                                                                                                                                                                                                                                                                                                                                         |
|------------------------------------------------|---|-------------------------------------------------------------------------------------------------------------------------------------------------------------------------------------------------------------------------------------------------------------------------------------------------------------------------------------------------------------------------------------------------------------------------------------------------------------------------------------------------------------------------------------------------------------------------------------------------------------------------------------------------------------------------|
| Evidence of optimization (from gradients)      | D |                                                                                                                                                                                                                                                                                                                                                                                                                                                                                                                                                                                                                                                                         |
| Specificity (gel, sequence, melt, or digest)   | E | Melting curve analysis, ramping from 55°C to 95°C in 23 minutes, where fluorescence data are measured continuously (measured melting temperature values are provided as Supplementary data). Gene-specific amplification was confirmed by a single band in 2% agarose gel electrophoresis stained with ethidium bromide. No template controls (no cDNA in PCR) were run for each gene to detect unspecific amplification and primer dimerization.                                                                                                                                                                                                                       |
| For SYBR Green I, Cq of the NTC                | E | The signal of the amplification plot was very late (Cq>34) and therefore there was a high Cq value difference between the negative control and all the cDNA sample. Except for NTC of 18S, which resulted in Cq = 23, but with a large difference in Cq between negative control and cDNA samples (9 cycles).                                                                                                                                                                                                                                                                                                                                                           |
| Calibration curves with slope and y intercept  | E | <b>18S:</b> $y = -3.4565x + 18.583$ ; <b>ALB:</b> $y = -3.7177x + 23.337$ ; <b>CYCA:</b> $y = -3.4558x + 29.735$ ; <b>B2M:</b> $y = -3.6546x + 28.884$ ; <b>HPRT:</b> $y = -3.7614x + 36.36$ ; <b>ACTB:</b> $y = -3.1409x + 34.767$ ; <b>GAPDH:</b> $y = -3.6999x + 33.184$ ; <b>SDHA:</b> $-3.4508x + 32.495$ ; <b>5S:</b> $y = -3.6192x + 18.903$ ; <b>miR-16:</b> $y = -3.87x + 31.098$ ; <b>miR-Let7a:</b> $y = -3.5412x + 33.203$ ; <b>RNU48:</b> $y = -3.7538x + 31.008$ ; <b>U6:</b> $y = -3.5078 + 18.347$ ; <b>miR-191:</b> $-3.2389x + 31.87$ ; <b>miR-103:</b> $-3.2621x + 35.334$ , <b>miR-122:</b> $-3.4731x + 31.654$ , <b>CCNG1:</b> $-3.8298x + 34.697$ |
| PCR efficiency calculated from slope           | E | <b>18S:</b> 97.3%; <b>ALB:</b> 92.9%; <b>CYCA:</b> 97.4%; <b>B2M:</b> 93.9%; <b>HPRT:</b> 92.0%; <b>ACTB:</b> 104.0%; <b>GAPDH:</b> 93.2%; <b>SDHA:</b> 97.5%; <b>5S:</b> 94.5%; <b>miR-16:</b> 90.7%; <b>miR-Let7a:</b> 95.8%; <b>RNU48:</b> 92.3%; <b>U6:</b> 96.5%; <b>miR-191:</b> 103.9 %; <b>miR-103:</b> 103.7 %; <b>miR-122:</b> 97 %; <b>CCNG1:</b> 92 %                                                                                                                                                                                                                                                                                                       |
| CIs for PCR efficiency or SE                   | D |                                                                                                                                                                                                                                                                                                                                                                                                                                                                                                                                                                                                                                                                         |
| r2 of calibration curve                        | E | <b>18S:</b> 0.9961; <b>ALB:</b> 0.9968; <b>CYCA:</b> 0.9830; <b>B2M:</b> 0.9955; <b>HPRT:</b> 0.9924; <b>ACTB:</b> 0.9951; <b>GAPDH:</b> 0.9937; <b>SDHA:</b> 0.9935; <b>5S:</b> 1.0000; <b>miR-16:</b> 0.9976; <b>miR-Let7a:</b> 0.9774; <b>RNU48:</b> 0.998; <b>U6:</b> 0.998; <b>miR-191:</b> 0.997; <b>miR-103:</b> 0.991; <b>miR-122:</b> 0.9905; <b>CCNG1:</b> 0.9868                                                                                                                                                                                                                                                                                             |
| Linear dynamic range                           | E | In average, linear dynamic range was considered taking into account the linearity of the standard curves; from 1/10 dilution of cDNA to 1/800 dilution                                                                                                                                                                                                                                                                                                                                                                                                                                                                                                                  |
| Cq variation at LOD                            | E |                                                                                                                                                                                                                                                                                                                                                                                                                                                                                                                                                                                                                                                                         |
| CIs throughout range                           | D |                                                                                                                                                                                                                                                                                                                                                                                                                                                                                                                                                                                                                                                                         |
| Evidence for LOD                               | E |                                                                                                                                                                                                                                                                                                                                                                                                                                                                                                                                                                                                                                                                         |
| If multiplex, efficiency and LOD of each assay | E | Not applicable                                                                                                                                                                                                                                                                                                                                                                                                                                                                                                                                                                                                                                                          |

| Data analysis                                             |   |                                                                                                                                                                                                                                                                                                               |
|-----------------------------------------------------------|---|---------------------------------------------------------------------------------------------------------------------------------------------------------------------------------------------------------------------------------------------------------------------------------------------------------------|
| qPCR analysis program (source, version)                   | E | MxPro QPCR Software                                                                                                                                                                                                                                                                                           |
| Method of Cq determination                                | E | The threshold is determined using the Amplification-based Threshold method. The threshold is used to specify Cq values of samples.                                                                                                                                                                            |
| Outlier identification and disposition                    | E | None of the Cq values was discarded                                                                                                                                                                                                                                                                           |
| Results for NTCs                                          | E | The signal of the amplification plot was very late (Cq>34) and therefore there was a high Cq value difference between the negative control and all the cDNA sample. Except for NTC of 18S, which resulted in Cq = 23, but with a large difference in Cq between negative control and cDNA samples (9 cycles). |
| Justification of number and choice of reference genes     | E | This is a study for the selection of reference genes                                                                                                                                                                                                                                                          |
| Description of normalization method                       | E | Described in text                                                                                                                                                                                                                                                                                             |
| Number and concordance of biological replicates           | D |                                                                                                                                                                                                                                                                                                               |
| Number and stage (RT or qPCR) of technical replicates     | E | qPCR reactions were performed in duplicate                                                                                                                                                                                                                                                                    |
| Repeatability (intraassay variation)                      | E | Mean standard deviation of duplicates: 0.10                                                                                                                                                                                                                                                                   |
| Reproducibility (interassay variation, CV)                | D |                                                                                                                                                                                                                                                                                                               |
| Power analysis                                            | D |                                                                                                                                                                                                                                                                                                               |
| Statistical methods for results significance              | E | Student's t Test                                                                                                                                                                                                                                                                                              |
| Software (source, version)                                | E | R Project                                                                                                                                                                                                                                                                                                     |
| Cq or raw data submission with RDML                       | D | In Supplementary data                                                                                                                                                                                                                                                                                         |
| qPCR target information                                   |   |                                                                                                                                                                                                                                                                                                               |
| Gene symbol                                               | E | Table 1 in paper                                                                                                                                                                                                                                                                                              |
| Sequence accession number                                 | E | Table 1 in paper                                                                                                                                                                                                                                                                                              |
| Location of amplicon                                      | D |                                                                                                                                                                                                                                                                                                               |
| Amplicon length                                           | E | Table 1 in paper                                                                                                                                                                                                                                                                                              |
| In silico specificity screen (BLAST, and so on)           | E | Described in text                                                                                                                                                                                                                                                                                             |
| Pseudogenes, retropseudogenes, or other homologs?         | D |                                                                                                                                                                                                                                                                                                               |
| Sequence alignment                                        | D |                                                                                                                                                                                                                                                                                                               |
| Secondary structure analysis of amplicon                  | D |                                                                                                                                                                                                                                                                                                               |
| Location of each primer by exon or intron (if applicable) | E | For microRNA and smal RNA this is not applicable; for the rest of genes, see references cited in Table 1                                                                                                                                                                                                      |
| What splice variants are targeted?                        | E |                                                                                                                                                                                                                                                                                                               |
| qPCR oligonucleotides                                     |   |                                                                                                                                                                                                                                                                                                               |
| Primer sequences                                          | E | Table 1 in paper                                                                                                                                                                                                                                                                                              |
| RTPrimerDB identification number                          | D |                                                                                                                                                                                                                                                                                                               |
| Probe sequences                                           | D |                                                                                                                                                                                                                                                                                                               |
| Location and identity of any modifications                | E | No modifications were done                                                                                                                                                                                                                                                                                    |
| Manufacturer of oligonucleotides                          | D | Alpha DNA. IDT oligo                                                                                                                                                                                                                                                                                          |
| Purification method                                       | D | Desalted                                                                                                                                                                                                                                                                                                      |

| qPCR target information                                   |   |                            |
|-----------------------------------------------------------|---|----------------------------|
| Gene symbol                                               | E | Table 1 in paper           |
| Sequence accession number                                 | E | Table 1 in paper           |
| Location of amplicon                                      | D |                            |
| Amplicon length                                           | E | Table 1 in paper           |
| In silico specificity screen (BLAST, and so on)           | E | Described in text          |
| Pseudogenes, retropseudogenes, or other homologs?         | D |                            |
| Sequence alignment                                        | D |                            |
| Secondary structure analysis of amplicon                  | D |                            |
| Location of each primer by exon or intron (if applicable) | E |                            |
| What splice variants are targeted?                        | E |                            |
| qPCR oligonucleotides                                     |   |                            |
| <b>Primer sequences</b>                                   | E | Table 1 in paper           |
| <b>RTPrimerDB identification number</b>                   | D | -                          |
| <b>Probe sequences</b>                                    | D | -                          |
| <b>Location and identity of any modifications</b>         | E | No modifications were done |
| <b>Manufacturer of oligonucleotides</b>                   | D | Alpha DNA, IDT oligo       |
| <b>Purification method</b>                                | D | Desalted                   |
