# Supplementary material for: Reference Genes for Real-Time PCR Quantification of MicroRNAs and Messenger RNAs in Rat Models of Hepatotoxicity
Source: PubMed Central journal article supplement (PMC3341372; doi:10.1371/journal.pone.0036323), 2012-05-01
Supplement: pone.0036323.s005.pdf [file pone.0036323.s005.pdf]

**Table S2**

**Normality assessment of log-transformed expression data of candidate reference genes by Shapiro-Wilk test**

| <b>Gen Symbol</b>                                           | <b>W</b> | <b>p-value</b> |
|-------------------------------------------------------------|----------|----------------|
| <b>Candidate reference genes for microRNA normalization</b> |          |                |
| <i>5S</i>                                                   | 0.9494   | 0.1088         |
| <i>miR-16</i>                                               | 0.9683   | 0.3985         |
| <i>miR-103</i>                                              | 0.9839   | 0.8769         |
| <i>miR-191</i>                                              | 0.9771   | 0.6642         |
| <i>miR-Let7a</i>                                            | 0.9576   | 0.193          |
| <i>RNU48</i>                                                | 0.9634   | 0.2877         |
| <b>Candidate reference genes for mRNA normalization</b>     |          |                |
| <i>18S</i>                                                  | 0.9817   | 0.814          |
| <i>B2M</i>                                                  | 0.9898   | 0.9825         |
| <i>HPRT1</i>                                                | 0.967    | 0.3672         |
| <i>SDHA</i>                                                 | 0.9817   | 0.8118         |

**W: the value of the Shapiro-Wilk statistic, p.value: an approximate p-value for the test.**
