# Supplementary material for: Reference Genes for Real-Time PCR Quantification of MicroRNAs and Messenger RNAs in Rat Models of Hepatotoxicity
Source: PubMed Central journal article supplement (PMC3341372; doi:10.1371/journal.pone.0036323), 2012-05-01
Supplement: pone.0036323.s007.pdf [file pone.0036323.s007.pdf]

## Data S2

### Candidate reference genes for microRNA normalization

#### BestKeeper version 1

<http://gene-quantification.com/bestkeeper.html>

**Result - Genes:** Repeated Pair-wise Correlation Analysis & Regression Analysis of BestKeeper vs. Housekeeping Genes

#### CP data of housekeeping Genes:

|                    | 5S<br>HKG 1 | mir16<br>HKG 2 | mir 103<br>HKG 3 | mir 191<br>HKG 4 | mir let7a<br>HKG 5 | RNU48<br>HKG 6 |
|--------------------|-------------|----------------|------------------|------------------|--------------------|----------------|
| n                  | 35          | 35             | 35               | 35               | 35                 | 35             |
| geo Mean [CP]      | 10.33       | 22.80          | 30.09            | 26.45            | 24.10              | 23.46          |
| ar Mean [CP]       | 10.33       | 22.80          | 30.10            | 26.45            | 24.10              | 23.46          |
| min [CP]           | 9.82        | 22.27          | 29.00            | 25.33            | 23.42              | 22.48          |
| max [CP]           | 10.78       | 23.44          | 31.06            | 27.57            | 24.96              | 24.68          |
| std dev [± CP]     | 0.19        | 0.25           | 0.39             | 0.35             | 0.25               | 0.35           |
| CV [% CP]          | 1.82        | 1.08           | 1.30             | 1.34             | 1.03               | 1.50           |
| min [x-fold]       | -1.39       | -1.37          | -2.22            | -2.27            | -1.56              | -1.83          |
| max [x-fold]       | 1.33        | 1.46           | 2.02             | 2.27             | 1.75               | 2.12           |
| std dev [± x-fold] | 1.13        | 1.17           | 1.28             | 1.25             | 1.17               | 1.25           |

#### Pearson correlation coefficient (r)

| vs.                 | HKG 1  | HKG 2 | HKG 3  | HKG 4  | HKG 5 | HKG 6 |
|---------------------|--------|-------|--------|--------|-------|-------|
| HKG 2               | 0.415  | -     | -      | -      | -     | -     |
| p-value             | 0.013  | -     | -      | -      | -     | -     |
| HKG 3               | -0.045 | 0.182 | -      | -      | -     | -     |
| p-value             | 0.796  | 0.297 | -      | -      | -     | -     |
| HKG 4               | 0.149  | 0.351 | 0.715  | -      | -     | -     |
| p-value             | 0.391  | 0.039 | 0.001  | -      | -     | -     |
| HKG 5               | 0.061  | 0.072 | 0.176  | -0.021 | -     | -     |
| p-value             | 0.729  | 0.684 | 0.311  | 0.905  | -     | -     |
| HKG 6               | -0.020 | 0.057 | -0.222 | -0.225 | 0.440 | -     |
| p-value             | 0.913  | 0.743 | 0.199  | 0.193  | 0.008 | -     |
| BestKeeper vs.      | HKG 1  | HKG 2 | HKG 3  | HKG 4  | HKG 5 | HKG 6 |
| coeff. of corr. [r] | 0.589  | 0.638 | 0.515  | 0.606  | 0.483 | 0.326 |
| p-value             | 0.001  | 0.001 | 0.002  | 0.001  | 0.003 | 0.056 |

#### Regression Analysis: HKG vs. BestKeeper

|                       | 5S<br>HKG 1 | mir16<br>HKG 2 | mir 103<br>HKG 3 | mir 191<br>HKG 4 | mir let7a<br>HKG 5 | RNU48<br>HKG 6 |
|-----------------------|-------------|----------------|------------------|------------------|--------------------|----------------|
| vs.                   | vs.         | vs.            | vs.              | vs.              | vs.                | vs.            |
|                       | BK          | BK             | BK               | BK               | BK                 | BK             |
| coeff. of corr. [r]   | 0.59        | 0.64           | 0.52             | 0.61             | 0.48               | 0.33           |
| coeff. of det. [r^2]  | 0.35        | 0.41           | 0.27             | 0.37             | 0.23               | 0.11           |
| intercept [CP]        | -5.72       | 1.01           | 2.80             | -5.22            | 7.50               | 7.05           |
| slope [CP]            | 0.74        | 1.00           | 1.25             | 1.46             | 0.76               | 0.75           |
| SE [CP]               | ±0.202      | ±0.241         | ±0.416           | ±0.38            | ±0.275             | ±0.436         |
| p-value               | 0.001       | 0.001          | 0.002            | 0.001            | 0.003              | 0.056          |
| Power of HKG [x-fold] | 1.60        | 1.81           | 2.50             | 2.90             | 1.64               | 1.59           |

## Candidate reference genes for microRNA normalization

geNorm™ version 3.5

<http://medgen.ugent.be/~jvdesomp/genorm/>

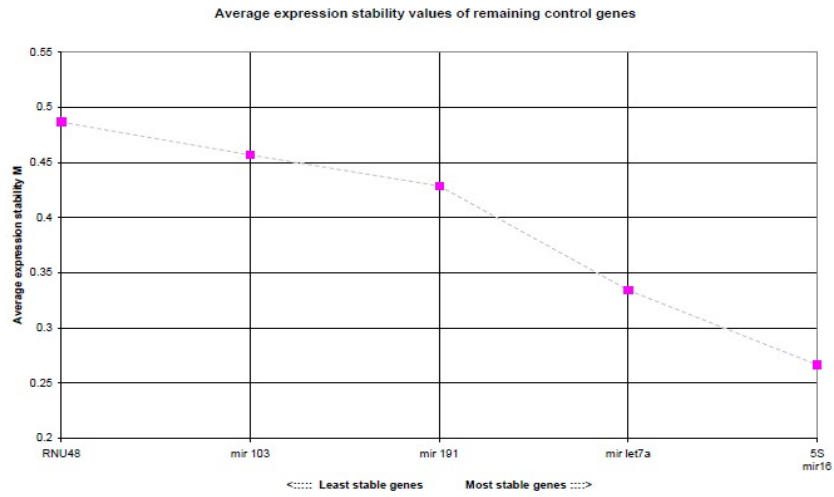

## Candidate reference genes for microRNA normalization

### NormFinder version 0953

<http://www.mdl.dk/publicationsnormfinder.htm>

| Gene name        | Stability value | Best gene Stability value                                                        |                         |
|------------------|-----------------|----------------------------------------------------------------------------------|-------------------------|
| <i>5S</i>        | 0.152           |                                                                                  |                         |
| <i>mir16</i>     | 0.138           |                                                                                  |                         |
| <i>mir 103</i>   | 0.249           | <b>Best combination of two genes<br/>Stability value for best combination of</b> | 5S and mir 191<br>0.110 |
| <i>mir 191</i>   | 0.206           |                                                                                  |                         |
| <i>mir let7a</i> | 0.162           |                                                                                  |                         |
| <i>RNU48</i>     | 0.253           |                                                                                  |                         |

#### Intragroup variation

| Group identifier | 1     | 2     | 3     | 4     | 5     | 6     | 7     |
|------------------|-------|-------|-------|-------|-------|-------|-------|
| <i>5S</i>        | 0.001 | 0.006 | 0.006 | 0.016 | 0.044 | 0.115 | 0.014 |
| <i>mir16</i>     | 0.001 | 0.000 | 0.001 | 0.002 | 0.010 | 0.008 | 0.003 |
| <i>mir 103</i>   | 0.023 | 0.085 | 0.083 | 0.005 | 0.008 | 0.067 | 0.025 |
| <i>mir 191</i>   | 0.038 | 0.182 | 0.003 | 0.026 | 0.025 | 0.060 | 0.063 |
| <i>mir let7a</i> | 0.003 | 0.091 | 0.031 | 0.047 | 0.002 | 0.018 | 0.018 |
| <i>RNU48</i>     | 0.059 | 0.151 | 0.054 | 0.057 | 0.034 | 0.108 | 0.083 |

#### Intergroup variation

| Group identifier | 1      | 2      | 3      | 4      | 5      | 6      | 7      |
|------------------|--------|--------|--------|--------|--------|--------|--------|
| <i>5S</i>        | 0.135  | -0.038 | 0.006  | 0.096  | -0.077 | 0.047  | -0.168 |
| <i>mir16</i>     | -0.004 | -0.209 | 0.067  | 0.094  | 0.037  | 0.181  | -0.167 |
| <i>mir 103</i>   | -0.094 | -0.036 | -0.193 | -0.259 | 0.255  | -0.007 | 0.334  |
| <i>mir 191</i>   | -0.310 | -0.099 | 0.033  | 0.001  | 0.082  | -0.016 | 0.310  |
| <i>mir let7a</i> | 0.143  | 0.172  | -0.002 | -0.061 | -0.066 | -0.061 | -0.125 |
| <i>RNU48</i>     | 0.130  | 0.210  | 0.089  | 0.130  | -0.230 | -0.145 | -0.183 |

## Candidate reference genes for microRNA normalization

### RankAggreg package of R project

<http://cran.rproject.org/web/packages/RankAggreg/index.html>

#### Rank aggregation without weights

```
x <- matrix(c
("2", "4", "1", "3", "5", "6",
"2", "1", "5", "4", "3", "6",
"2", "1", "5", "4", "3", "6")
byrow=TRUE, ncol=6)
> (toplist <- BruteAggreg(x, 6))
```

The optimal list is:  
2 1 5 4 3 6

Algorithm: BruteForce  
Distance: Spearman  
Score: 2

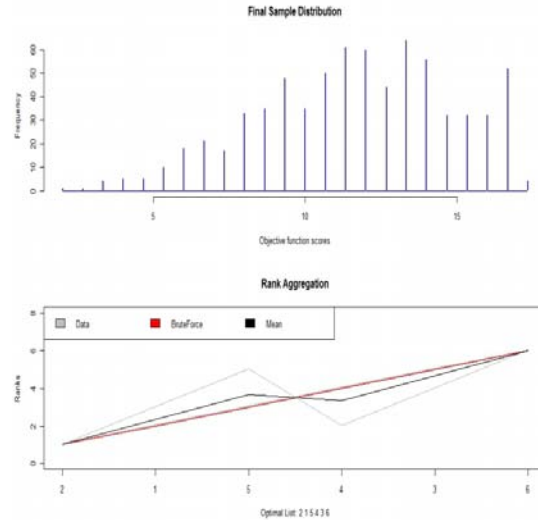

#### Rank aggregation without weights

```
x <- matrix(c
("2", "4", "1", "3", "5", "6",
"1", "2", "5", "4", "3", "6",
"2", "1", "5", "4", "3", "6")
byrow=TRUE, ncol=6)
> (toplist <- BruteAggreg(x, 6))
```

The optimal list is:  
2 1 5 4 3 6

Algorithm: BruteForce  
Distance: Spearman  
Score: 2.666667

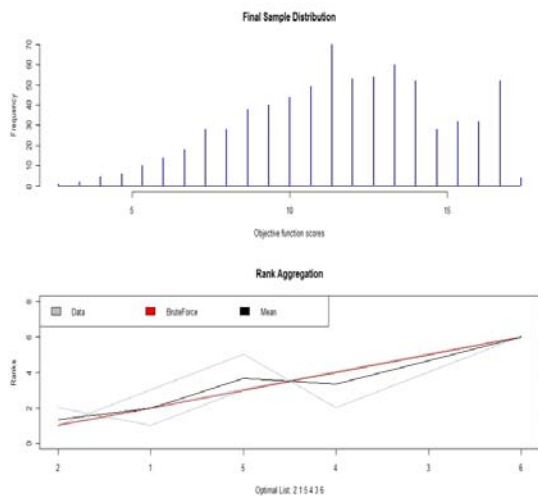

#### Gene references

|   |           |
|---|-----------|
| 1 | 5S        |
| 2 | miR-16    |
| 3 | miR-103   |
| 4 | miR-191   |
| 5 | miR-Let7a |
| 6 | RNU48     |

## Candidate reference genes for mRNA normalization

### BestKeeper version 1

<http://gene-quantification.com/bestkeeper.html>

#### Result - Genes: Repeated Pair-wise Correlation Analysis & Regression

Analysis of BestKeeper vs. Housekeeping Genes

#### CP data of housekeeping Genes:

|                         | 18S   | B2M   | HPRT  | SDHA  |
|-------------------------|-------|-------|-------|-------|
|                         | HKG 1 | HKG 2 | HKG 3 | HKG 4 |
| n                       | 35    | 35    | 35    | 35    |
| geo Mean [CP]           | 11.77 | 22.09 | 29.34 | 26.32 |
| ar Mean [CP]            | 11.78 | 22.09 | 29.35 | 26.33 |
| min [CP]                | 11.09 | 21.20 | 28.37 | 25.11 |
| max [CP]                | 12.45 | 22.87 | 30.93 | 27.41 |
| std dev [ $\pm$ CP]     | 0.28  | 0.31  | 0.47  | 0.48  |
| CV [% CP]               | 2.39  | 1.42  | 1.61  | 1.83  |
| min [x-fold]            | -1.71 | -1.75 | -1.81 | -2.24 |
| max [x-fold]            | 1.71  | 1.64  | 2.63  | 2.06  |
| std dev [ $\pm$ x-fold] | 1.25  | 1.28  | 1.45  | 1.46  |

#### Pearson correlation coefficient ( r )

| vs.                        | HKG 1        | HKG 2        | HKG 3        | HKG 4        |
|----------------------------|--------------|--------------|--------------|--------------|
| HKG 2                      | -0.048       | -            | -            | -            |
| p-value                    | 0.781        | -            | -            | -            |
| HKG 3                      | -0.238       | 0.287        | -            | -            |
| p-value                    | 0.168        | 0.095        | -            | -            |
| HKG 4                      | 0.230        | 0.220        | 0.100        | -            |
| p-value                    | 0.183        | 0.203        | 0.566        | -            |
| <b>BestKeeper vs.</b>      | <b>HKG 1</b> | <b>HKG 2</b> | <b>HKG 3</b> | <b>HKG 4</b> |
| <b>coeff. of corr. [r]</b> | <b>0.587</b> | <b>0.540</b> | <b>0.401</b> | <b>0.686</b> |
| <b>p-value</b>             | <b>0.001</b> | <b>0.001</b> | <b>0.017</b> | <b>0.001</b> |

#### Regression Analysis: HKG vs. BestKeeper

|                                  | 18S        | B2M        | HPRT        | SDHA       |
|----------------------------------|------------|------------|-------------|------------|
|                                  | HKG 1      | HKG 2      | HKG 3       | HKG 4      |
|                                  | vs.        | vs.        | vs.         | vs.        |
|                                  | BK         | BK         | BK          | BK         |
| coeff. of corr. [r]              | 0.59       | 0.54       | 0.40        | 0.69       |
| coeff. of det. [r <sup>2</sup> ] | 0.35       | 0.29       | 0.16        | 0.47       |
| intercept [CP]                   | -4.79      | 4.90       | 10.79       | -4.91      |
| slope [CP]                       | 0.78       | 0.81       | 0.88        | 1.48       |
| SE [CP]                          | $\pm 0.29$ | $\pm 0.34$ | $\pm 0.538$ | $\pm 0.42$ |
| p-value                          | 0.001      | 0.001      | 0.017       | 0.001      |
| Power of HKG [x-fold]            | 1.85       | 1.67       | 1.71        | 2.68       |

## Candidate reference genes for mRNA normalization

### geNorm™ version 3.5 Output

<http://medgen.ugent.be/~jvdesomp/genorm/>

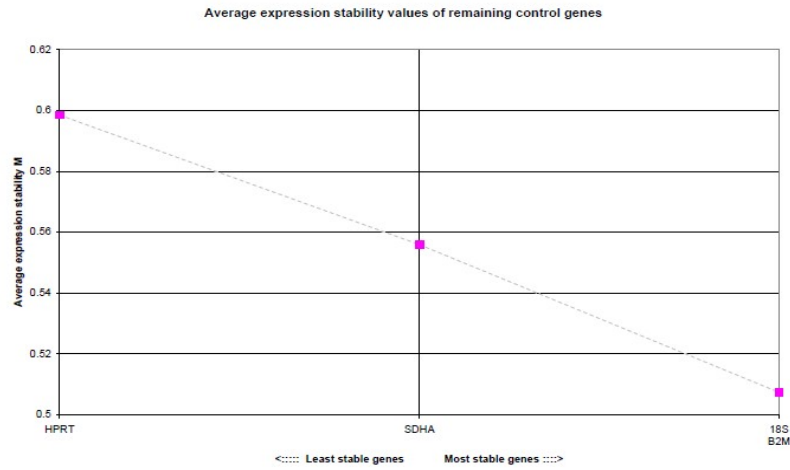

## Candidate reference genes for mRNA normalization

### NormFinder version 0953

<http://www.mdl.dk/publicationsnormfinder.htm>

| Gene name    | Stability value | Best gene Stability value                                |              |
|--------------|-----------------|----------------------------------------------------------|--------------|
| <i>18S</i>   | 0.180           |                                                          | B2M 0.172    |
| <i>B2M</i>   | 0.172           |                                                          |              |
| <i>HPRT1</i> | 0.230           | <b>Best combination of two genes</b>                     | B2M and SDHA |
| <i>SDHA</i>  | 0.209           | <b>Stability value for best combination of two genes</b> | 0.128        |

#### Intragroup variation

| Group identifier | 1     | 2     | 3     | 4     | 5     | 6     | 7     |
|------------------|-------|-------|-------|-------|-------|-------|-------|
| <i>18S</i>       | 0.039 | 0.005 | 0.061 | 0.026 | 0.191 | 0.063 | 0.238 |
| <i>B2M</i>       | 0.017 | 0.005 | 0.001 | 0.005 | 0.011 | 0.016 | 0.002 |
| <i>HPRT1</i>     | 0.090 | 0.270 | 0.121 | 0.008 | 0.090 | 0.097 | 0.047 |
| <i>SDHA</i>      | 0.084 | 0.161 | 0.137 | 0.231 | 0.008 | 0.008 | 0.026 |

#### Intergroup variation

| Group identifier | 1      | 2      | 3      | 4      | 5      | 6      | 7      |
|------------------|--------|--------|--------|--------|--------|--------|--------|
| <i>18S</i>       | 0.028  | -0.063 | -0.010 | -0.031 | 0.045  | 0.174  | -0.144 |
| <i>B2M</i>       | -0.165 | -0.223 | -0.069 | 0.070  | 0.035  | 0.091  | 0.262  |
| <i>HPRT1</i>     | -0.029 | 0.256  | -0.127 | 0.143  | -0.117 | -0.237 | 0.109  |
| <i>SDHA</i>      | 0.166  | 0.030  | 0.205  | -0.183 | 0.038  | -0.028 | -0.228 |

## Candidate reference genes for mRNA normalization

### RankAggreg package of R project

<http://cran.rproject.org/web/packages/RankAggreg/index.html>

#### Rank aggregation without weights

```
x <- matrix(c
("4", "1", "2", "3"),
"2", "1", "4", "3",
+ "2", "1", "4", "3")
byrow=TRUE, ncol=4)
(toplist <- BruteAggreg(x, 4))
```

The optimal list is:  
2 1 4 3

Algorithm: BruteForce  
Distance: Spearman  
Score: 1.333333

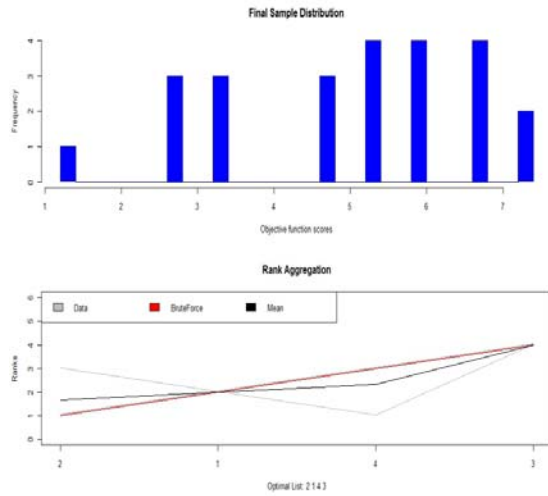

#### Rank aggregation without weights

```
x <- matrix(c
("4", "1", "2", "3",
"1", "2", "4", "3",
"2", "1", "4", "3")
byrow=TRUE, ncol=4)
> (toplist <- BruteAggreg(x, 4))
```

The optimal list is:  
1 2 4 3

Algorithm: BruteForce  
Distance: Spearman  
Score: 2

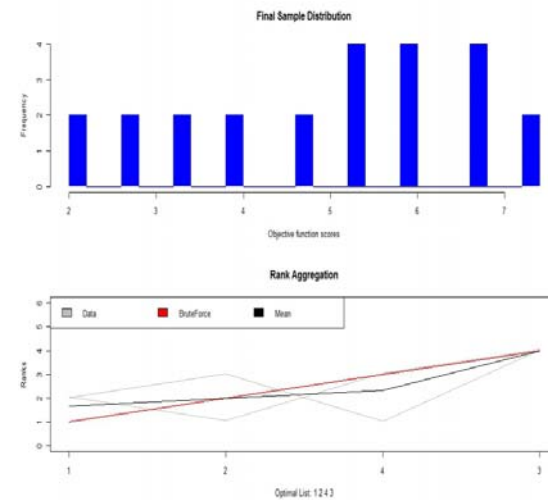

#### Gene references

|   |              |
|---|--------------|
| 1 | <i>18S</i>   |
| 2 | <i>B2M</i>   |
| 3 | <i>HPRT1</i> |
| 4 | <i>SDHA</i>  |
